# Supplementary material for: Self-assembled two-dimensional gold nanoparticle film for sensitive nontargeted analysis of food additives with surface-enhanced Raman spectroscopy
Source: Royal Society of Chemistry journal article supplement (doi:10.1039/c8an00540k), 2018-01-01
Supplement: c8an00540k1.pdf [file c8an00540k1.pdf]

## Supporting information for

Self-assembly two-dimensional gold nanoparticles film for sensitive analysis non-targeted of food additives with Surface-enhanced Raman spectroscopy

### Figures:

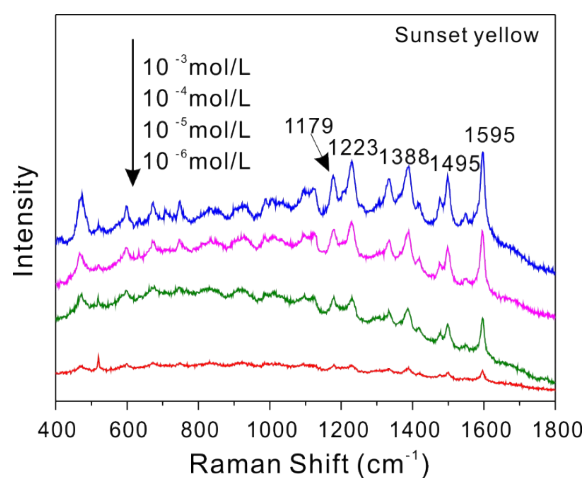

**Figure S1:** The SERS features of sunset yellow with the concentration ranging from  $10^{-3}$  M to  $10^{-6}$  M.

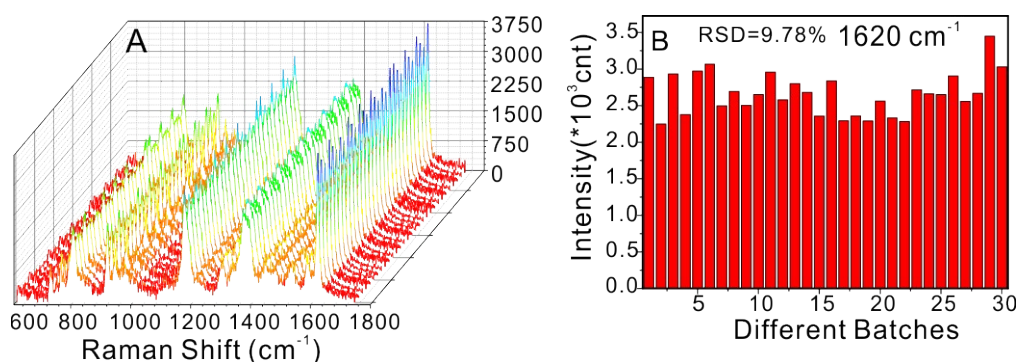

**Figure S2:** (A) The SERS spectra of crystal violet (CV) collected from different batches after one month store time and (B) the variation of SERS intensity at the Raman modes of 1620  $\text{cm}^{-1}$ .
